# Supplementary material
Source: publisher site journal article supplement (https://www.dovepress.com/article/supplementary_file/545695/545695%20Supplementary%20Material.xlsx)
Supplement: Supplementary file 1 [file 545695%20Supplementary%20Material.xlsx]

## Sheet: Sheet1
Supplementary File S1: Dinucleotide Odd Ratio Frequencies in Psoriasis Gene Coding Regions
GENE	AA	AC	AG	AT	CA	CC	CG	CT	GA	GC	GG	GT	TA	TC	TG	TT
HLA-C	0.631875	1.00661	1.25255	0.88054	1.09675	1.08035	0.664336	1.45119	1.33424	0.935315	0.926733	0.870902	0.528324	0.980023	1.50273	0.552283		Overall
CARD14	0.672989	0.824337	1.44073	0.820669	1.28703	1.04305	0.525794	1.55017	1.24103	1.0582	0.931319	0.718201	0.364742	1.02875	1.4679	0.792053			AA	1.02623
NFKB1	1.03797	0.932126	1.07467	0.937167	1.21069	1.09489	0.329899	1.41152	1.1027	1.01864	1.12065	0.713341	0.623003	0.969593	1.43819	0.996525			AC	0.823646
CFI	1.2254	0.895833	0.980392	0.835073	1.29167	1.21347	0.308841	1.1531	0.972549	1.04234	1.00765	0.997163	0.577592	0.93618	1.47855	1.08306			AG	1.26948
KIAA1109	0.955994	0.940265	1.21983	0.924727	1.24447	0.856855	0.189215	1.38187	1.27174	0.89877	1.06572	0.695982	0.684298	1.24705	1.23379	1.05927			AT	0.847544
IL2	1.00081	1.15493	1.1307	0.765484	1.40845	0.638821	0.116077	1.33549	1.16395	1.10273	0.958904	0.716675	0.533519	1.01174	1.57668	1.26667			CA	1.28864
IL21	1.0512	0.72768	1.17647	1.00147	1.28743	1.15473	0.145631	1.16935	1.35294	0.679612	0.918367	0.847458	0.36639	1.53226	1.5678	0.985222			CC	1.07974
BBS12	1.01431	1.01551	1.16872	0.851219	1.50358	0.771444	0.258824	1.14494	0.963309	1.08235	0.995025	0.9833	0.673664	1.07555	1.31107	1.0817			CG	0.384457
HFE2	0.922935	0.714286	1.27734	1.11411	1.28032	1.07857	0.466374	1.28071	1.08574	0.988714	1.28191	0.634249	0.575022	1.13374	1.18145	0.951714			CT	1.30799
FLG	0.884386	0.877994	1.22341	1.08384	1.41884	0.930927	0.338739	1.16702	1.12303	0.739068	1.18273	0.812238	0.509495	1.74295	1.1236	0.879472			GA	1.0557
LCE3C	1.32013	0.555247	1.61177	0.529101	1.61022	1.12139	0.176991	1.44231	0.560617	1.09735	1.07239	1.1471	0.10582	1.06838	1.88934	0.407332			GC	1.02616
LCE3B	0.924855	0.566572	1.92705	0.444444	1.52975	1.08333	0.168634	1.68937	0.825877	1.24789	0.696436	1.12508	0.222222	0.871935	2.25017	0			GG	0.990608
LCE3A	0.970874	0.485437	2.067	0.247831	1.75971	0.970579	0.285103	1.48791	0.641483	1.35424	0.711893	1.16533	0	0.99194	1.89366	0.506329			GT	0.871068
LCE3E	1.34378	0.776053	1.43443	0.243605	1.44124	1.12545	0.270453	1.56721	0.614754	1.04801	1.12453	1.11359	0.243605	0.904159	1.93022	0.396825			TA	0.479116
LCE2C	1.54044	0.644122	1.67394	0.374181	1.50295	1.12208	0.152114	1.52522	0.509461	1.12565	1.03093	1.06045	0.280636	0.899492	1.96182	0.477164			TC	1.05936
LCE1C	1.1465	0.418848	2.00852	0.211193	1.62304	1.16179	0.125	1.69124	0.547778	1.15	1.01685	1.05847	0.31679	0.910668	1.91532	0.174825			TG	1.51817
LCE1A	0.91638	0.494805	2.14646	0.110497	1.58337	1.06883	0.163577	1.76527	0.631313	1.19956	0.93913	1.03469	0.331492	1.00191	1.88679	0.106496			TT	0.898021
SMCP	1.20324	0.644468	1.28845	0.866873	1.45005	1.1301	0.0426803	1.08074	0.498753	1.49381	0.792602	1.37795	0.185759	0.826446	2.85433	0.58651
IVL	0.675233	0.524813	1.7414	0.50164	1.73651	0.944939	0.0192197	2.45343	0.92512	1.39663	0.921576	0.512492	0.366583	1.13585	1.55349	0.567859
SPRR2C	0.555556	0.833333	2.22222	1.11111	1.66667	0	0	0.833333	0	1.66667	0	2.22222	1.11111	1.66667	1.11111	0.555556
SPRR2G	0.906843	0.571701	2.0429	0.902935	1.28633	1.26652	0.117994	0.977836	0.715015	1.35693	0.126422	1.53631	0.677201	0.586701	2.65363	0.617284
LELP1	1.64195	0.378358	1.43836	0.808081	0.908059	1.43243	0.244618	1.1063	1.0274	1.17417	0.177148	1.48084	0.26936	0.865801	2.61324	0.599315
PRR9	1.0101	0.352361	1.83413	0.846945	1.51515	1.49303	0	0.854214	0.757576	1.12655	0.679983	1.61186	0.423472	1.02506	1.86976	0.58651
LOR	1.55807	0.561798	1.37931	0.599251	1.31086	0.643883	0.874192	1.88231	0.66092	1.15545	1.11986	0.547279	0.898876	1.54547	0.744907	0.633914
PGLYRP3	0.854203	0.928978	1.05351	1.15987	1.55829	1.04082	0.322706	1.17858	0.886288	1.03266	1.26783	0.765901	0.541272	0.984634	1.51515	0.885296
PGLYRP4	0.982456	0.989419	1.04618	0.962567	1.47039	1.11948	0.234137	1.28456	0.866836	0.913135	1.29854	0.895976	0.552585	0.963418	1.59453	0.796957
S100A9	0.972262	0.883704	1.02564	1.16482	1.23719	1.09218	0.380389	1.43988	1.12821	0.972105	1.22649	0.417827	0.407688	1.15191	1.60167	0.948992
SLC12A8	1.03761	0.708438	1.46292	0.757257	1.18073	1.16932	0.30611	1.47059	1.22751	0.955063	1.12477	0.687173	0.420698	1.11826	1.32526	1.00307
BSG	0.890805	1.00652	1.17783	0.76225	1.2302	0.918873	0.676353	1.4834	1.19714	0.951904	0.999092	0.853659	0.290381	1.24794	1.41463	0.641907
SMARCA4	0.950127	0.73732	1.2912	1.03425	1.15594	1.11924	0.640003	1.23512	1.19124	1.01711	0.937147	0.779352	0.350494	1.14594	1.41659	0.901157
OR7A10	0.985019	1.08846	0.917653	0.988417	1.434	1.03273	0.162635	1.1832	0.96595	0.772515	1.33561	0.999636	0.633205	1.05318	1.59942	0.84864
TNFRSF9	1.11496	1.00967	1.1592	0.68812	1.20301	1.03192	0.41019	1.37915	1.21716	0.82038	0.932039	1.01688	0.445254	1.15306	1.46431	0.958671
TNFRSF1B	0.896712	0.89267	1.29931	0.792988	1.32325	1.08912	0.518173	1.28002	1.01838	1.03635	0.965347	0.970731	0.43823	0.897334	1.6473	0.760357
KAZN	0.949864	0.804718	1.28145	0.850611	1.14872	1.05989	0.645441	1.44312	1.19408	1.03097	0.928284	0.787328	0.305688	1.11693	1.48093	0.769889
IGSF21	0.86594	1.02791	1.11329	0.914983	1.18916	1.08303	0.668871	1.13813	1.26009	0.876451	0.951937	1.00349	0.381243	1.00635	1.57068	0.838432
PAX7	0.874636	0.864808	1.24426	0.992411	1.25309	1.09952	0.602956	1.18753	1.05048	0.978994	1.08647	0.814868	0.505935	1.01435	1.37241	0.954719
CAPZB	1.08166	0.846024	1.04786	0.980592	1.07163	1.18329	0.366725	1.53807	1.26681	0.907161	0.97929	0.776007	0.449438	1.13464	1.65688	0.739726
IFNLR1	0.947603	0.877893	1.30836	0.743134	1.18715	1.27107	0.319285	1.45698	1.22906	0.80176	1.22673	0.689417	0.371567	1.02914	1.37883	1.06742
RUNX3	0.748013	1.04799	1.11929	0.925649	1.26862	0.983863	0.757576	1.19752	1.06038	1.04254	1.03925	0.733634	0.447895	0.901662	1.42965	1.10603
AZIN2	0.991263	0.932983	1.13999	0.882446	1.3929	1.17139	0.329856	1.35568	1.08299	1.0698	0.990099	0.855432	0.409707	0.764111	1.68948	0.886787
CSMD2	0.930928	0.948837	1.17512	0.919418	1.38247	1.06352	0.454071	1.22564	1.04455	0.920354	1.12917	0.905013	0.463795	1.061	1.4439	0.877916
OMA1	1.08094	0.810661	1.17049	0.904338	1.28817	1.12754	0.255509	1.16416	1.01698	1.11785	1.13119	0.812678	0.713579	1.03481	1.1987	1.13704
IL23R	1.02606	0.886918	1.18636	0.942392	1.10865	1.3439	0.16899	1.11717	1.30994	0.760456	1.13931	0.669003	0.683995	1.03923	1.30615	1.19491
LRRC7	0.978961	0.831798	1.25747	0.93579	1.21141	1.27023	0.362506	1.08662	1.05832	0.96915	1.11597	0.834503	0.741569	0.979492	1.20106	1.16973
AK5	0.966396	1.01368	1.05145	0.941781	1.19108	1.02339	0.542075	1.31709	1.23043	0.929272	1.11643	0.639535	0.513699	1.05367	1.30814	1.1865
SPATA1	1.15085	0.732119	1.14128	0.875195	1.2202	1.25973	0.136519	1.15949	1.22774	0.887372	1.10063	0.719268	0.503537	1.25414	1.30776	1.25434
DDAH1	1.13883	0.832408	1.02321	0.979249	1.03589	1.07914	0.765984	1.21689	1.0843	1.20369	0.916247	0.768322	0.629517	0.811262	1.39874	1.11278
GBP6	1.05018	0.788508	1.21729	0.884886	1.28035	1.17028	0.251116	1.31479	1.14966	0.967262	1.03932	0.78125	0.466145	1.16266	1.4119	1.09963
KIAA1107	1.12813	0.749952	1.16184	0.864329	1.2339	0.987116	0.255768	1.29316	1.10198	1.06661	0.914761	0.879046	0.575479	1.30205	1.36196	1.08444
CEPT1	1.05263	1.00061	0.900508	1.01414	1.56155	0.953895	0.285551	1.03659	0.987654	1.12317	1.14901	0.84122	0.614068	0.95122	1.4254	1.07028
DENND2D	1.15674	0.722559	1.31456	0.816915	1.17947	1.09332	0.352677	1.37954	1.24477	0.961847	1.1466	0.640406	0.372417	1.22503	1.25665	1.13537
PTPN22	1.15671	0.809294	1.12073	0.877323	1.09646	1.23209	0.134018	1.30106	1.20806	0.915792	1.15816	0.716937	0.601311	1.10439	1.40857	1.10819
CYLD	1.11301	0.916895	1.12604	0.819322	1.16802	1.21862	0.302185	1.25192	1.1853	0.860065	1.04187	0.854943	0.584621	1.05778	1.33054	1.14965
NOD2	1.02091	0.852506	1.28177	0.795937	1.42084	1.01208	0.373631	1.4492	1.07	1.095	1.04874	0.738916	0.295634	0.991295	1.54454	0.921337
FTO	0.91954	0.751252	1.27724	1.05871	1.33556	1.08992	0.490597	1.15304	1.27724	1.06296	0.809419	0.754717	0.288739	1.15304	1.50943	1.08827
CDH8	1.04265	0.897206	0.946197	1.08129	1.18559	1.18048	0.464096	1.10477	1.15028	0.953506	1.14821	0.736978	0.657466	1.00838	1.38809	1.04985
SMPD3	0.995364	0.96896	1.17607	0.757238	1.23994	1.04842	0.574831	1.39485	1.00562	1.01622	1.11857	0.751601	0.549369	0.920959	1.37329	0.986098
CDH3	0.837949	0.984131	1.18711	0.947436	1.29782	1.23601	0.383591	1.18362	1.23016	0.756526	1.09217	0.931113	0.419058	1.03369	1.5387	0.899848
IL34	1.0813	0.835792	1.29218	0.694191	1.30285	1.13122	0.440464	1.39013	0.981096	1.01307	1.01472	0.982104	0.474973	0.941704	1.54954	0.733089
MLKL	1.12962	0.586899	1.24359	0.947169	1.0602	1.13861	0.467385	1.48597	1.2125	1.13798	0.884365	0.677813	0.442012	1.26582	1.40081	0.978893
CMIP	1.15967	0.884826	1.11808	0.808625	1.19196	1.03777	0.549344	1.34605	1.13502	1.04052	0.935769	0.855349	0.269542	1.02823	1.69987	0.877056
CDH13	1.00753	0.930233	1.0472	1.01883	1.26155	1.09001	0.492285	1.11489	1.21934	0.837619	1.04218	0.881175	0.432232	1.15442	1.51313	0.967433
MBTPS1	1.03797	0.862155	1.12723	0.958904	1.25815	1.17606	0.456729	1.15541	1.11772	0.951125	1.10357	0.808112	0.536986	1.01437	1.33827	1.09701
WFDC1	1.29712	0.717189	1.08565	1.00705	0.956251	1.05753	0.768574	1.42602	0.989144	1.22403	0.93364	0.689655	0.704935	0.77243	1.52924	0.750939
KIAA0513	1.0208	0.928892	1.22227	0.664268	0.976938	1.18493	0.552001	1.542	1.34299	0.815456	1.00473	0.823938	0.359812	1.12773	1.45273	0.875099
RNF150	0.982107	0.953014	1.0291	1.03708	1.21897	1.09529	0.681995	1.03533	1.18287	0.915822	1.02953	0.870286	0.455688	1.03533	1.38141	1.08277
DCHS2	0.926339	0.996985	1.06087	0.987876	1.16181	1.00492	0.772842	1.15245	1.19596	1.00469	0.987382	0.815315	0.566906	0.9907	1.27493	1.06143
MSMO1	1.09393	0.816417	0.89546	1.0563	1.30185	1.20062	0.146199	1.08924	1.24948	0.950292	1.34529	0.631199	0.631602	1.08924	1.33454	1.10336
SPATA4	1.08696	0.834281	1.22935	0.830431	1.13766	1.417	0.273411	1.04862	1.03726	0.888585	0.969529	1.06229	0.750067	1.00095	1.25543	1.14478
RAD50	1.05209	0.882542	1.11023	0.882403	1.17137	0.943022	0.412118	1.31439	1.19204	1.06283	0.842549	0.772002	0.596836	1.1872	1.37931	1.2073
IL13	1.05205	0.818331	1.28774	0.809717	1.473	0.998185	0.426649	1.23411	1.06572	1.18149	1.0324	0.689935	0.253036	0.972326	1.42045	1.24884
IL4	1.07099	1.05882	1.1889	0.582072	1.17647	0.847697	0.507614	1.566	1.28798	1.01523	0.890631	0.753769	0.310438	1.11857	1.54941	1.08268
STK32A	1.0568	1.03513	0.972973	0.906593	1.31744	1.16175	0.308048	1.17417	1.24324	0.847131	0.962177	0.876897	0.384615	0.978474	1.68634	1.09702
TNIP1	0.981317	0.72654	1.28333	0.937389	1.14171	1.19704	0.488053	1.38197	1.24666	1.02694	0.950803	0.699558	0.397948	1.05579	1.42857	1.04426
SPATA2	0.928235	0.814609	1.36971	0.885811	1.20849	1.00064	0.554037	1.40493	1.11359	1.10088	0.948801	0.750906	0.531487	1.07191	1.45003	0.76779
RNF114	0.948012	0.937658	1.06555	1.01597	1.21642	1.04998	0.748704	1.05846	1.20454	1.07506	0.877501	0.879701	0.522496	0.914121	1.38553	1.07497
CYP24A1	1.12537	0.812383	1.12755	0.894645	1.15271	1.04262	0.637011	1.22631	1.08617	1.16605	0.905484	0.814183	0.534117	0.975474	1.40512	1.10188
TRAF3IP2	0.983108	0.698413	1.34337	1.03337	1.23016	1.24736	0.296108	1.18524	1.14329	1.01523	1.05627	0.745926	0.538213	1.01319	1.48038	0.998315
AP1S3	1.04941	0.893617	1.02489	0.969267	1.19149	0.9942	0.513113	1.1965	1.20059	0.912201	1.13725	0.728309	0.661939	1.1965	1.13996	1.1506
Average	1.02623	0.823646	1.26948	0.847544	1.28864	1.07974	0.384457	1.30799	1.0557	1.02616	0.990608	0.871068	0.479116	1.05936	1.51817	0.898021
